# Supplementary material for: Structural and functional analysis of Oceanobacillus iheyensis macrodomain reveals a network of waters involved in substrate binding and catalysis
Source: PubMed Central journal article supplement (PMC5413906; doi:10.1098/rsob.160327), 2017-04-26
Supplement: rsob160327supp1.pdf [file rsob160327supp1.pdf]

## Supplementary Material

### Structural and functional analysis of *Oceanobacillus iheyensis* macrodomain reveals a network of waters involved in substrate binding and catalysis

#### Authors:

Rubén Zapata-Pérez<sup>†,‡</sup>, Fernando Gil-Ortiz<sup>\*,‡,‡,‡</sup>, Ana Belén Martínez-Moñino<sup>†</sup>, Antonio Ginés García-Saura, Jordi Juanhuix<sup>‡</sup>, Álvaro Sánchez-Ferrer<sup>\*,†,§</sup>

#### Affiliations:

<sup>†</sup>Department of Biochemistry and Molecular Biology-A, Faculty of Biology, Regional Campus of International Excellence "Campus Mare Nostrum", University of Murcia, Campus Espinardo, E-30100 Murcia, Spain

<sup>‡</sup>CELLS-ALBA Synchrotron Light Source, 08290 Barcelona, Spain

<sup>§</sup>Murcia Biomedical Research Institute (IMIB-Arrixaca), 30120 Murcia, Spain

<sup>‡</sup>These authors contributed equally to this work.

\*Correspondence and requests for materials should be addressed to F.G.-O. (email: [fgil@cells.es](mailto:fgil@cells.es)) or A.S-F (email: [alvaro@um.es](mailto:alvaro@um.es))

#### CONTENTS:

**Table S1.** B-factors of the protein and structural water molecules found in OiMacroD WT, mutants and related structures.

**Table S2.** Accession codes and organisms used in Figure S2.

**Supplementary Figure S1.** OiMacroD purification.

**Supplementary Figure S2.** Unrooted phylogenetic tree illustrating evolutionary relationships between OiMacroD and related macrodomains.

**Supplementary Figure S3.** Multiple sequence alignment between OiMacroD and related macrodomains

**Supplementary Figure S4.** Replacement of W5 in OiMacroD by residue Ser302 in the second binding macrodomain of hPARP15.

**Supplementary Figure S5.** F166 active and inactive conformations

**Supplementary Figure S6.** Stereo view of the dual conformer of the loop  $\beta 6$ - $\alpha 4$ .

**Supplementary Figure S7.** Dual ADP conformer found in the active centre of the OiMacroD-ADP crystal structure.

**Supplementary Figure S8.** Purity and identity of enzymatically synthesized OAADPr.

**Table S1.** B-factors of the protein and structural water molecules found in OiMacroD WT, its mutants and related structures.

| B-factors  | Protein Overall B-factor | W1   | W2   | W3             | W4   | W5   | W6                |
|------------|--------------------------|------|------|----------------|------|------|-------------------|
| MES        | 16.0                     | 10.9 | 13.6 | 17.9           | 15.9 | 6.6  | -                 |
| ADP-ribose | 24.0                     | 14.0 | 16.0 | - <sup>a</sup> | 17.4 | 16.1 | 16.8 <sup>b</sup> |
| ADP        | 19.6                     | 10.7 | 11.8 | 17.5           | 19.2 | 20.7 | -                 |
| G37V       | 18.4                     | 27.2 | 35.7 | 28.7           | 13.1 | 10.8 | -                 |
| D40A       | 42.8                     | 38.4 | 43.4 | 44.9           | 35.7 | 43.6 | -                 |
| N30A       | 15.4                     | 6.4  | 6.9  | 27.5           | 12.7 | 8.6  | -                 |
| 2X47       | 12.3                     | 17.7 | 15.9 | 13.9           | 18.3 | 19.9 | -                 |
| 2BFQ       | 23.4                     | 15.5 | 16.8 | 31.0           | 16.1 | 15.0 | 28.9              |
| 4IQY       | 20.8                     | 13.1 | 17.0 | 16.9           | 10.6 | 11.0 | 13.6              |
| 3GPO       | 19.2                     | 18.0 | 29.7 | - <sup>c</sup> | 16.7 | 15.8 |                   |

<sup>a</sup> W3 is absent in the OiMacroD-ADPr complex and is replaced by a glycerol molecule from the cryoprotectant, which carries out the same interactions.

<sup>b</sup> When an oligomer is present in the asymmetric unit, the data shown correspond to the average between all subunits

<sup>c</sup> W3 is absent in PDB 3GPO due to the presence of the side chain of residue W148, which hampers its binding. This residue shows low conservation and in other related structures is replaced by residues with shorter side chains that allow W3 binding. The O3''-ribose atom in this structure interacts directly with residue T111.

**Table S2.** Accession codes and organisms used in Figure S2

| Accession code | Organism and protein designation                        |
|----------------|---------------------------------------------------------|
| 4GUA           | Alphavirus P23 polyprotein                              |
| XP_003388308   | <i>Amphimedon queenslandica</i> LOC100640713            |
| XP_003386606   | <i>Amphimedon queenslandica</i> OARD1                   |
| Q94JV1         | <i>Arabidopsis thaliana</i> GDAP2                       |
| NP_030605      | <i>Arabidopsis thaliana</i> macrodomain                 |
| NP_001077989   | <i>Arabidopsis thaliana</i> PARG1                       |
| NP_850175      | <i>Arabidopsis thaliana</i> PARG2                       |
| O28751         | <i>Archaeoglobus fulgidus</i> 1521                      |
| Q3B7N1         | <i>Bos taurus</i> ALC1                                  |
| Q1LZ74         | <i>Bos taurus</i> OARD1                                 |
| F1ML90         | <i>Bos taurus</i> PARP14                                |
| AHY61336       | BtVs-BetaCoV/SC2013 ORF1ab polyprotein                  |
| Q59Z77         | <i>Candida albicans</i> Ca019.2285                      |
| 3GPO           | Chikungunya virus (CHIKV) macrodomain                   |
| Q6PHJ5         | <i>Danio rerio</i> MacroD2                              |
| Q1RLR9         | <i>Danio rerio</i> Macro-H2A.1                          |
| NP_001020673   | <i>Danio rerio</i> Macro-H2A.2                          |
| NP_001018591   | <i>Danio rerio</i> OARD1                                |
| XP_687541      | <i>Danio rerio</i> PARG                                 |
| XP_001340167   | <i>Danio rerio</i> PARP9b                               |
| 1SPV           | <i>Escherichia coli</i> YmdB                            |
| G3S362         | <i>Gorilla gorilla</i> PARP14                           |
| Q86WJ1         | Human ALC1                                              |
| 3EJG           | Human coronavirus 229E macrodomain                      |
| 2VRI           | Human coronavirus NL63 NSP3 X-Domain                    |
| Q9NXN4         | Human GDAP2                                             |
| 2X47           | Human MacroD1                                           |
| 4IQY           | Human MacroD2                                           |
| O75367         | Human Macro-H2A.1                                       |
| Q9P0M6         | Human Macro-H2A.2                                       |
| Q9Y530         | Human OARD1                                             |
| NP_003622      | Human PARG                                              |
| Q460N5         | Human PARP14b                                           |
| Q460N3         | Human PARP15                                            |
| XP_005247877   | Human PARP9b                                            |
| D1YK16         | <i>Lactobacillus gasseri</i> YmdB                       |
| YP_009047215   | MERS-CoV NSP3 protein                                   |
| Q9CXF7         | <i>Mus musculus</i> ALC1                                |
| Q922B1         | <i>Mus musculus</i> MacroD1                             |
| Q8R5F3         | <i>Mus musculus</i> OARD1                               |
| V5IN46         | <i>Neurospora crassa</i> macrodomain                    |
| Q8EP31         | <i>Oceanobacillus iheyensis</i> macrodomain             |
| YP_001949930   | <i>Ralstonia</i> phage tail assembly-like protein       |
| NP_013805      | <i>Saccharomyces cerevisiae</i> S288C                   |
| AAS56031       | <i>Saccharomyces cerevisiae</i> YBR022W                 |
| 2FAV           | SARS-CoV virus macrodomain                              |
| P67344         | <i>Staphylococcus aureus</i> SAV0325 macrodomain        |
| 2XD6           | <i>Thermus thermophilus</i> macrodomain                 |
| 3GQO           | Venezuelan Equine Encephalitis Virus (VEEV) Macrodomain |

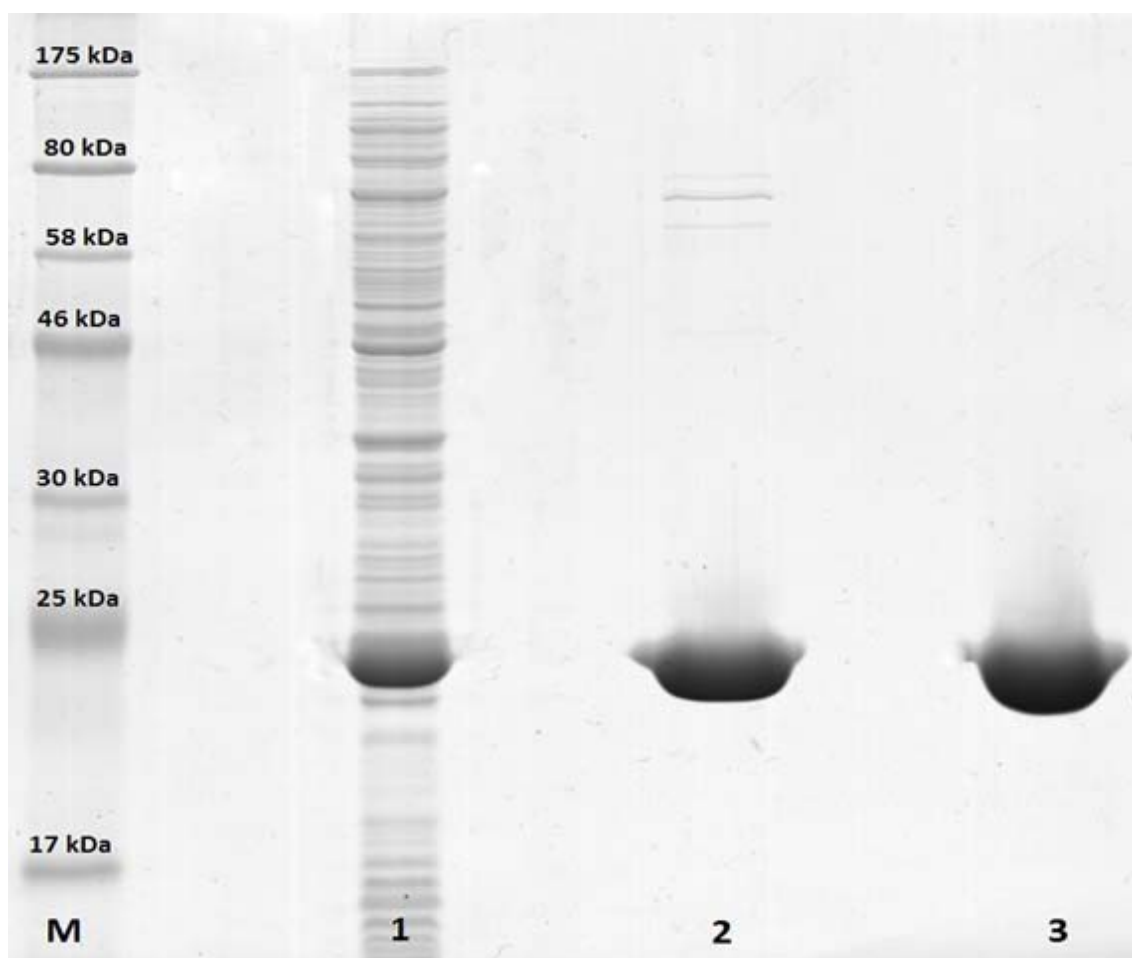

**Supplementary Figure S1.** OiMacroD purification. Each lane of the SDS-PAGE gel contains 10  $\mu$ g protein. M: Molecular weight standards (NEB: P7708S). Lane 1: Cell extract after disruption and DNase treatment. Lane 2: Desalted HisTrap fraction. Lane 3: HiLoad Superdex fraction

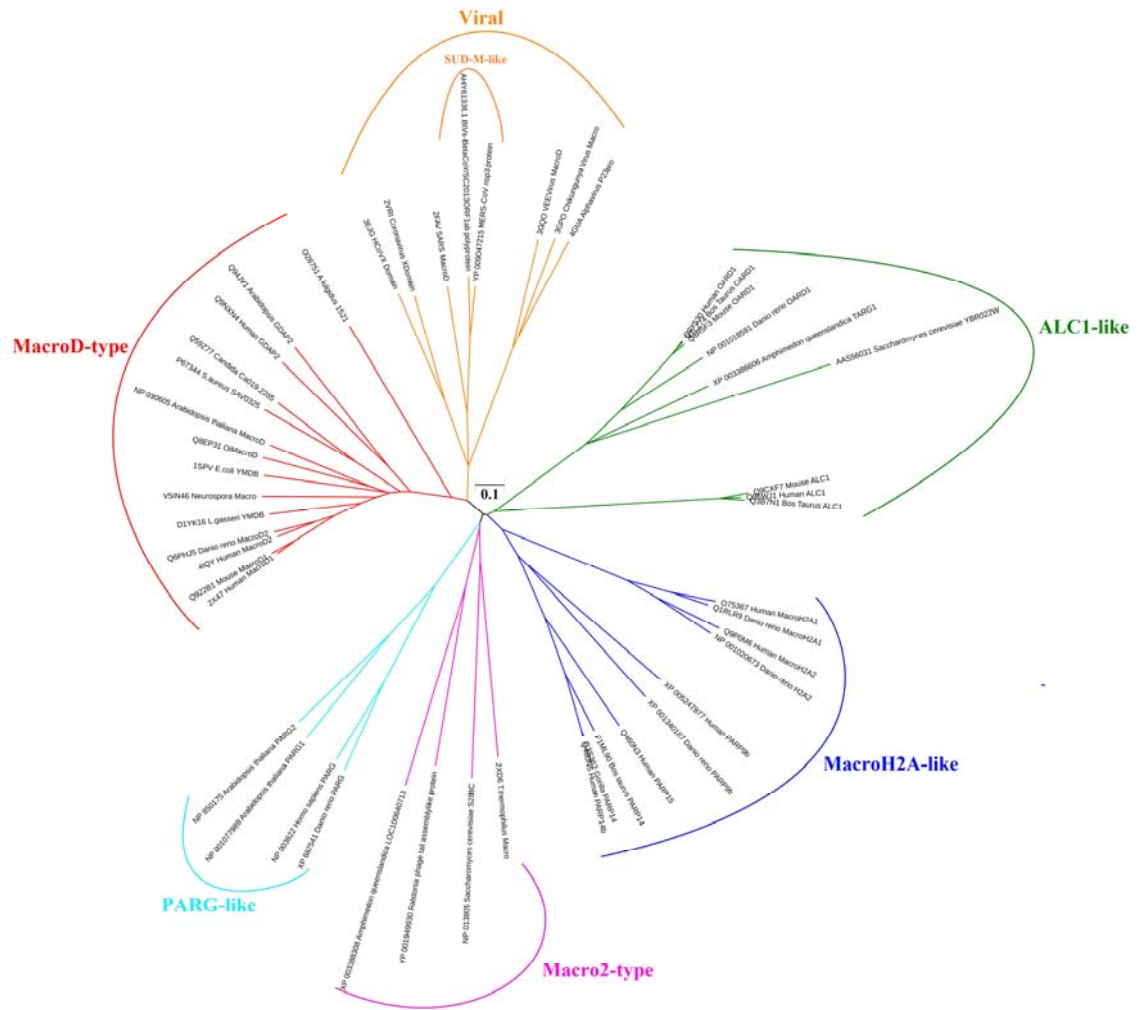

**Supplementary Figure S2.** Unrooted phylogenetic tree illustrating evolutionary relationships between OiMacroD and related macrodomains. Sequences selected for generating the tree are summarized in table S2.

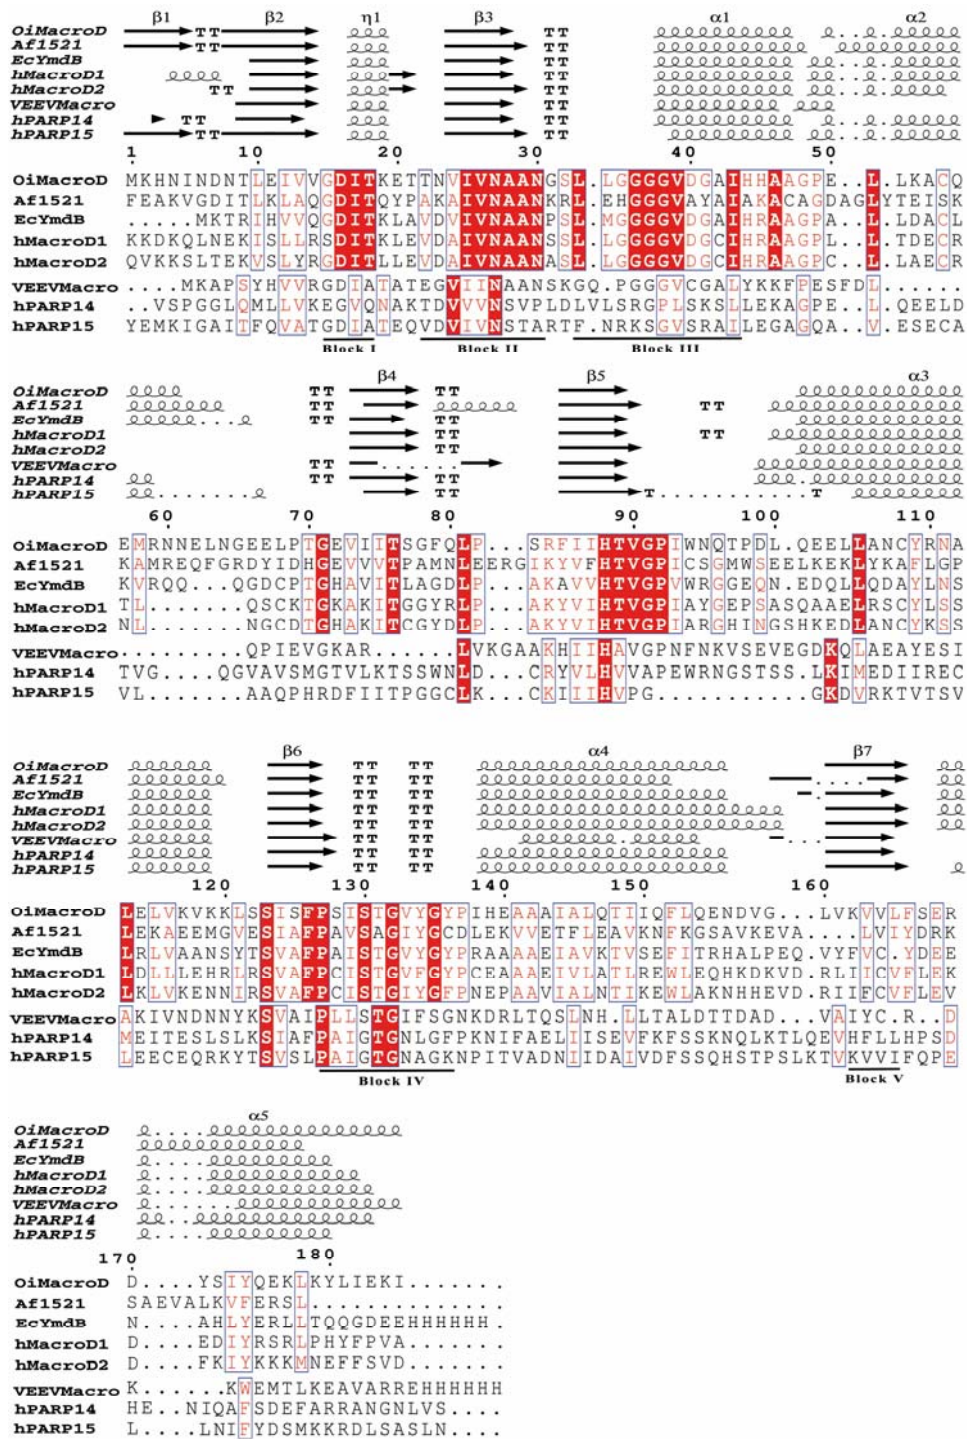

**Supplementary Figure S3.** Multiple sequence alignment between *OiMacroD* and related macrodomains. Strictly conserved residues have a red background and similar residues are marked with a blue square. Springs and arrows represent helices and strands of the secondary structure, respectively. Strict  $\beta$ -turns are represented as TT. Conserved blocks are underlined.



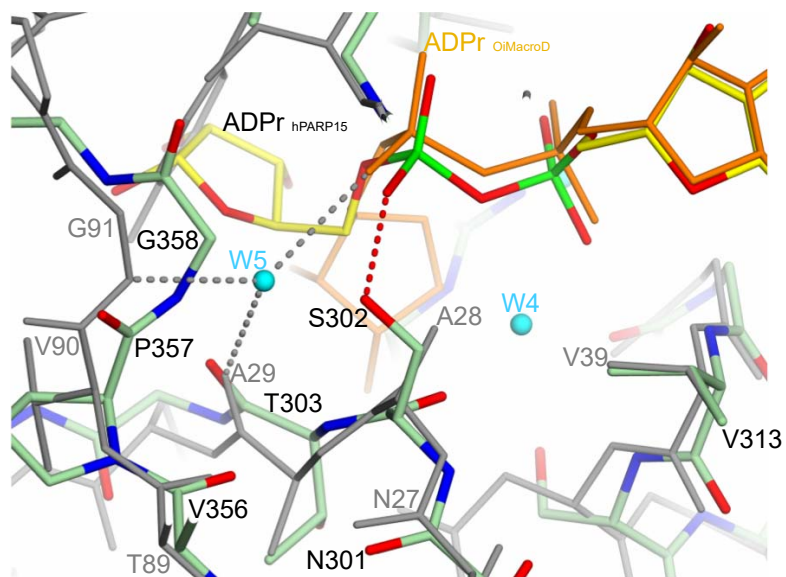

**Supplementary Figure S4.** Replacement of W5 in OiMacroD by residue Ser302 in the second binding macrodomain of hPARP15. Protein residues in hPARP15 and OiMacroD are coloured in green and grey, respectively. The ADPr molecule is in yellow (hPARP15) or orange (OiMacroD). Interactions are represented as dashed lines in red (hPARP15) or grey (OiMacroD). Water molecules are shown in cyan

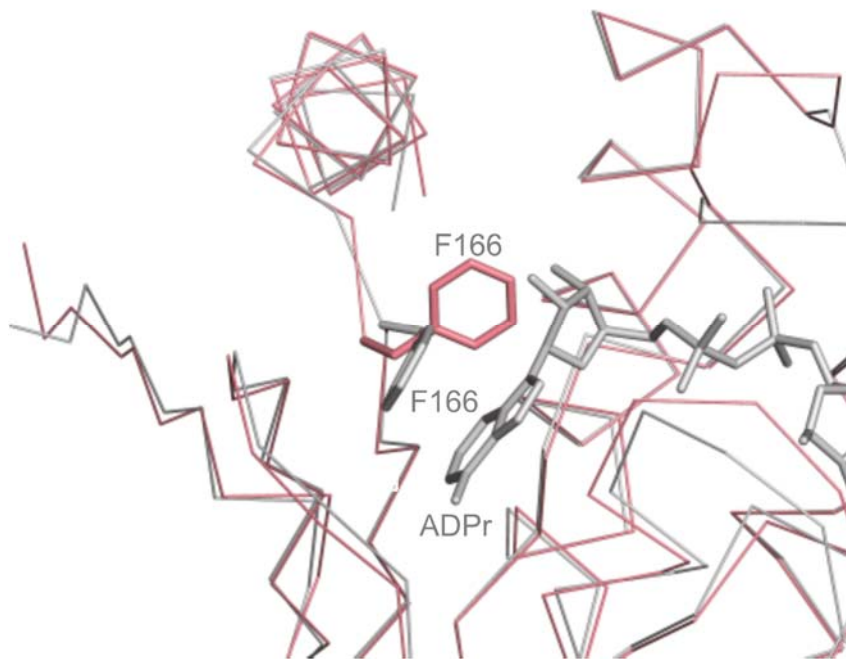

**Supplementary Figure S5.** F166 active and inactive conformations. Superimposition of mutant D40A (salmon) and ADPr complex (grey) crystal structures comparing the active (grey) and inactive (salmon) rotamer of residue F166. The ADPr molecule is shown in grey.



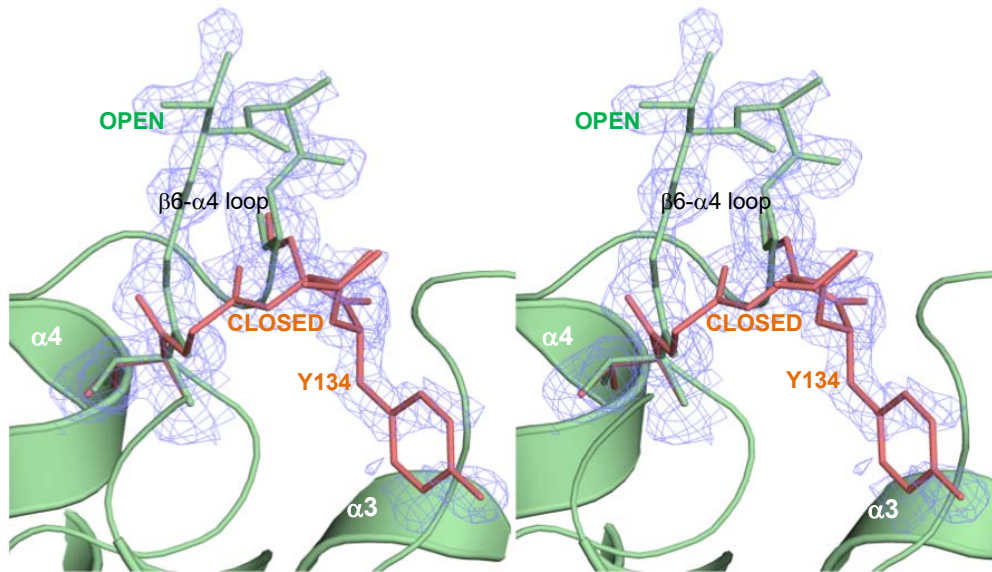

**Supplementary Figure S6.** Stereo view of the dual conformer of the loop  $\beta 6$ - $\alpha 4$  as found in a subunit of the crystal structure of mutant N30A. The  $2Fo-Fc$  ED map ( $1.0 \sigma$ ; blue) is shown for the open conformer (green; occupancy 0.55) and for the closed conformer (salmon; occupancy 0.45). Residue Y134 is only observed in the closed conformation (salmon).

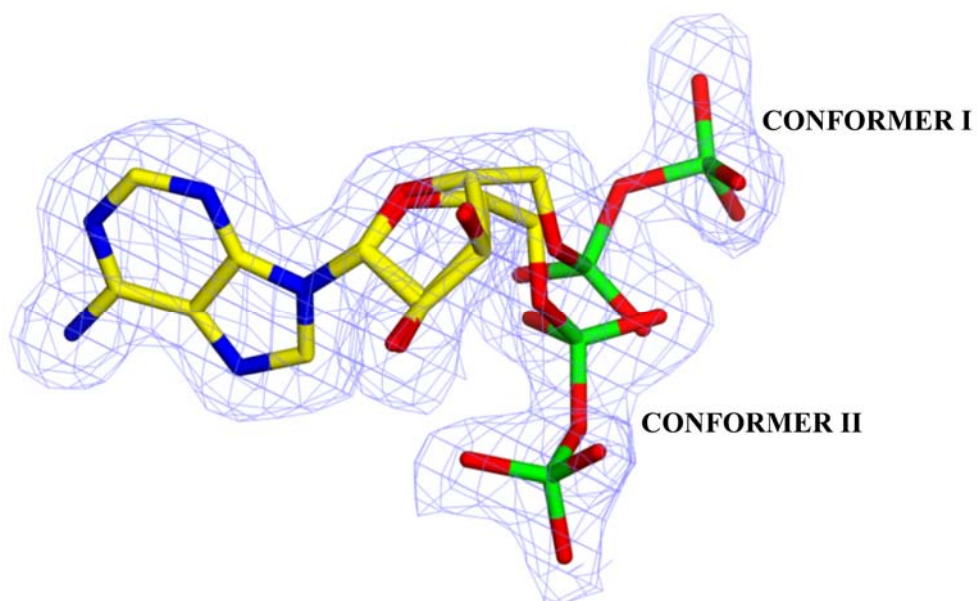

**Supplementary Figure S7.** Dual ADP conformer found in the active centre of the OiMacroD-ADP crystal structure (subunit A; 50% occupancy each). The  $2Fo-Fc$  ED map ( $1.0 \sigma$ ; blue) is shown around the ADP molecule.

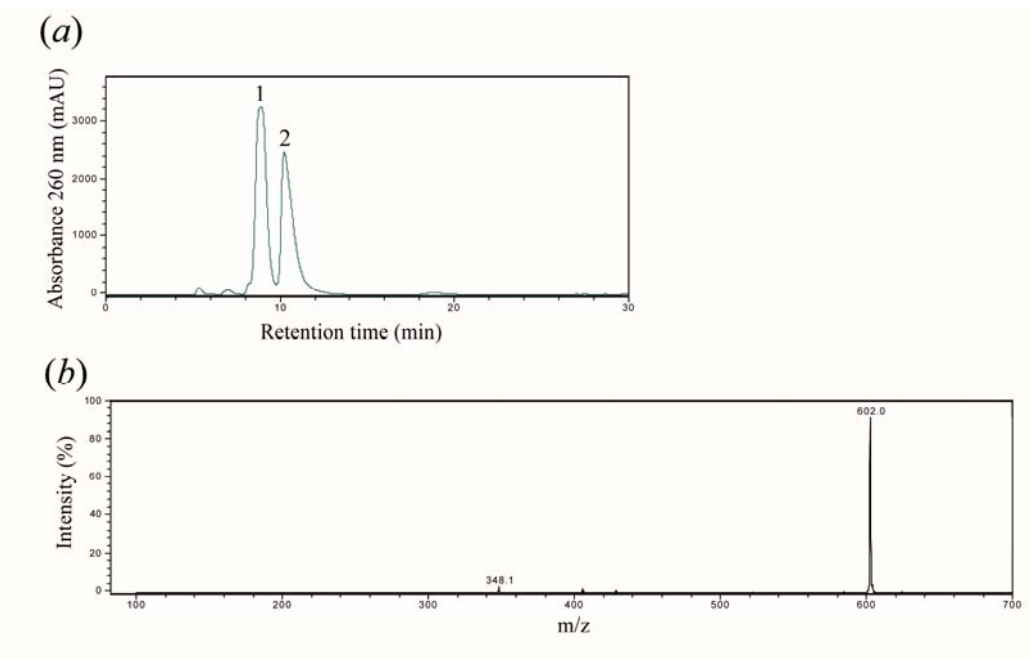

**Supplementary Figure S8.** Purity and identity of enzymatically synthesized OAADPr. (a) HPLC chromatogram at 260 nm showing the 3' (peak 1) and 2' (peak 2) isomers of OAADPr. (b) MS analysis of both OAADPr peaks. The 602.0  $m/z$  peak corresponds to the expected mass for this compound.
